# Supplementary material
Source: Research Square preprint supplement (doi:10.21203/rs.3.rs-9517577/v1)
Supplement: Supplementary file 1 [file 5f96338d91e8ff5bb2fcbbb7.pdf]

## **Survey on Malaysian Public's Awareness, Usage Status of Traditional Chinese Medicine and Suggestions for China-Malaysia TCM Exchanges**

### **Dear Respondent,**

Thank you for participating in this survey conducted by a Ph.D. candidate from China Henan University of Chinese Medicine. This survey focuses on multiple dimensions, including Malaysian public awareness, usage, expectations of traditional Chinese medicine (TCM) and suggestions for China-Malaysia TCM exchange and development. Your honest responses will help us understand public needs and expectations for TCM, provide policy references to promote China-Malaysia TCM cooperation, and improve the accessibility of TCM services. The questionnaire will take approximately 8-10 minutes (26 questions total), including single-choice, multiple answers allowed and open-ended question. All responses are anonymous and confidential, used solely for academic research. I appreciate your support!

For questions or assistance, please contact: Email: 316681524@qq.com;

Phone: +8613733163930; Institution: Henan University of Chinese Medicine (China)

### **1. Gender:**

- A. Male
- B. Female

### **2. Age:**

- A. 18-30
- B. 31-45
- C. 46-60
- D. Above 60

### **3. Occupation:**

- A. Student
- B. Lecturer
- C. Office worker (Corporate/Government)
- D. Healthcare professional (Western/TCM/Other)
- E. Freelancer/Self-employed
- F. Retiree
- G. Other: \_\_\_\_\_

### **4. Ethnicity:**

- A. Malay
- B. Chinese Malaysian
- C. Indian Malaysian
- D. Other: \_\_\_\_\_

### **5. State of Residence:**

- A. Selangor
- B. Penang
- C. Johor
- D. East Malaysia (Sabah/Sarawak)
- E. Other: \_\_\_\_\_

### **6. How familiar are you with TCM (traditional Chinese medicine) (e.g., acupuncture, herbal medicine, Tuina)?**

- A. Very familiar
- B. Somewhat familiar
- C. Neutral
- D. Not very familiar
- E. Not at all familiar

**7. How do you primarily learn about TCM? (Multiple answers allowed)**

- A. Family/Friends
- B. Social media/Online search
- C. TV/Newspapers/Books
- D. Medical institutions
- E. Educational institutions
- F. Other: \_\_\_\_\_

**8. Which TCM classics have you heard of? (Multiple answers allowed)**

- A. *Yellow Emperor's Inner Canon (Huangdi Neijing)*
- B. *Shennong's Herbal Classic (Shennong Bencao Jing)*
- C. *Treatise on Cold Damage (Shanghan Lun by Zhang Zhongjing)*
- D. *Compendium of Materia Medica (Bencao Gangmu by Li Shizhen)*
- E. None of the above.
- F. Other: \_\_\_\_\_

**9. How long do you think TCM has been developing in Malaysia?**

- A. Over 100 years
- B. 50-100 years
- C. After China-Malaysia diplomatic relations (1974)
- D. Not sure

**10. How familiar are you with Malaysia's established TCM pharmacies (e.g., Eu Yan Sang, Tongrentang)?**

- A. Very familiar (can name  $\geq 3$  brands and their specialty products)
- B. Somewhat familiar (know 1-2 brands but not details)
- C. Slightly aware (heard of "established TCM pharmacies" but can't name any)
- D. Not familiar (only noticed shop signs)
- E. Completely unfamiliar

**11. What are TCM's advantages? (Multiple answers allowed)**

- A. Fewer side effects
- B. Holistic healing
- C. Cost-effective
- D. Preventive care & chronic disease management
- E. Cultural relevance
- F. Not sure
- G. Other: \_\_\_\_\_

**12. Do you agree that "TCM needs more modern scientific validation"?**

- A. Strongly agree
- B. Agree
- C. Neutral
- D. Disagree
- E. Strongly disagree

**13. Should TCM be included in Malaysia's national medical insurance system?**

- A. Strongly agree
- B. Agree
- C. Neutral
- D. Disagree
- E. Strongly disagree

**14. Your overall attitude toward TCM:**

- A. Very supportive
- B. Somewhat supportive
- C. Neutral
- D. Not very supportive
- E. Completely opposed

**15. How often do you use TCM (traditional Chinese medicine)?**

- A. Frequently ( $\geq 1$ /week)
- B. Regularly (1-3/month)
- C. Occasionally (1-3/year)
- D. Rarely ( $\leq 3$  times)
- E. Never

**16. Which TCM services have you used? (*Multiple answers allowed*)**

- A. Herbal medicine
- B. Acupuncture
- C. Tuina massage
- D. Cupping/Scraping (Gua sha)
- E. None
- F. Other: \_\_\_\_\_

**17. Your possible purpose of using TCM? (*Multiple answers allowed*)**

- A. Treat illnesses/recovery
- B. Wellness (immunity/anti-aging)
- C. Beauty (e.g., acne)
- D. Family traditions (herbal diets/seasonal regimens)
- E. Religious customs (e.g., Halal postnatal care)
- F. Other: \_\_\_\_\_

**18. Satisfaction with TCM efficacy:**

- A. Very satisfied
- B. Somewhat satisfied
- C. Neutral
- D. Not very satisfied
- E. Very dissatisfied

**19. Barriers to TCM usage? (*Multiple answers allowed*)**

- A. High cost
- B. Unclear efficacy
- C. Lack of certified practitioners
- D. Cultural differences
- E. Limited awareness
- F. Other: \_\_\_\_\_

**20. Would you recommend TCM to others?**

- A. Highly recommend
- B. Likely recommend
- C. Unsure
- D. Unlikely to recommend
- E. Never recommend

**21. What improvements does TCM in Malaysia need most? (*Multiple answers allowed*)**

- A. Practitioner qualifications
- B. Herbal quality control
- C. Government policy support
- D. Public awareness
- E. China-Malaysia cooperation
- F. Halal certification
- G. Other: \_\_\_\_\_

**22. Support establishing TCM departments in public hospitals?**

- A. Strongly support
- B. Support
- C. Neutral
- D. Oppose
- E. Strongly oppose

**23. Priority areas for China-Malaysia TCM collaboration? (*Multiple answers allowed*)**

- A. Herbal trade
- B. Medical skills exchange
- C. Talent training
- D. Scientific research
- E. Other: \_\_\_\_\_

**24. Impacts of China-Malaysia diplomatic relations on TCM? (*Multiple answers allowed*)**

- A. Legalization/standardization
- B. Accelerated talent/tech exchange
- C. Boosted herbal imports/local production
- D. Increased public acceptance
- E. Integration with other medical systems

**25. Your anticipation for future China-Malaysia TCM exchanges?**

- A. Very high
- B. Somewhat high
- C. Neutral
- D. Low
- E. None

**26. Suggestions to enhance China-Malaysia TCM exchanges and cooperation?**

---

---
